# Supplementary material for: Microbial processes in the weathering crust aquifer of a temperate glacier
Source: Copernicus journal article supplement (doi:10.5194/tc-12-3653-2018), 2018-11-26
Supplement: Supplementary file 1 [file tc-12-3653-2018-supplement.pdf]

Supplement of The Cryosphere, 12, 3653–3669, 2018  
<https://doi.org/10.5194/tc-12-3653-2018-supplement>  
© Author(s) 2018. This work is distributed under  
the Creative Commons Attribution 4.0 License.

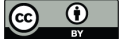

*Supplement of*

## **Microbial processes in the weathering crust aquifer of a temperate glacier**

**Brent C. Christner et al.**

*Correspondence to:* Brent C. Christner (xner@ufl.edu)

The copyright of individual parts of the supplement might differ from the CC BY 4.0 License.

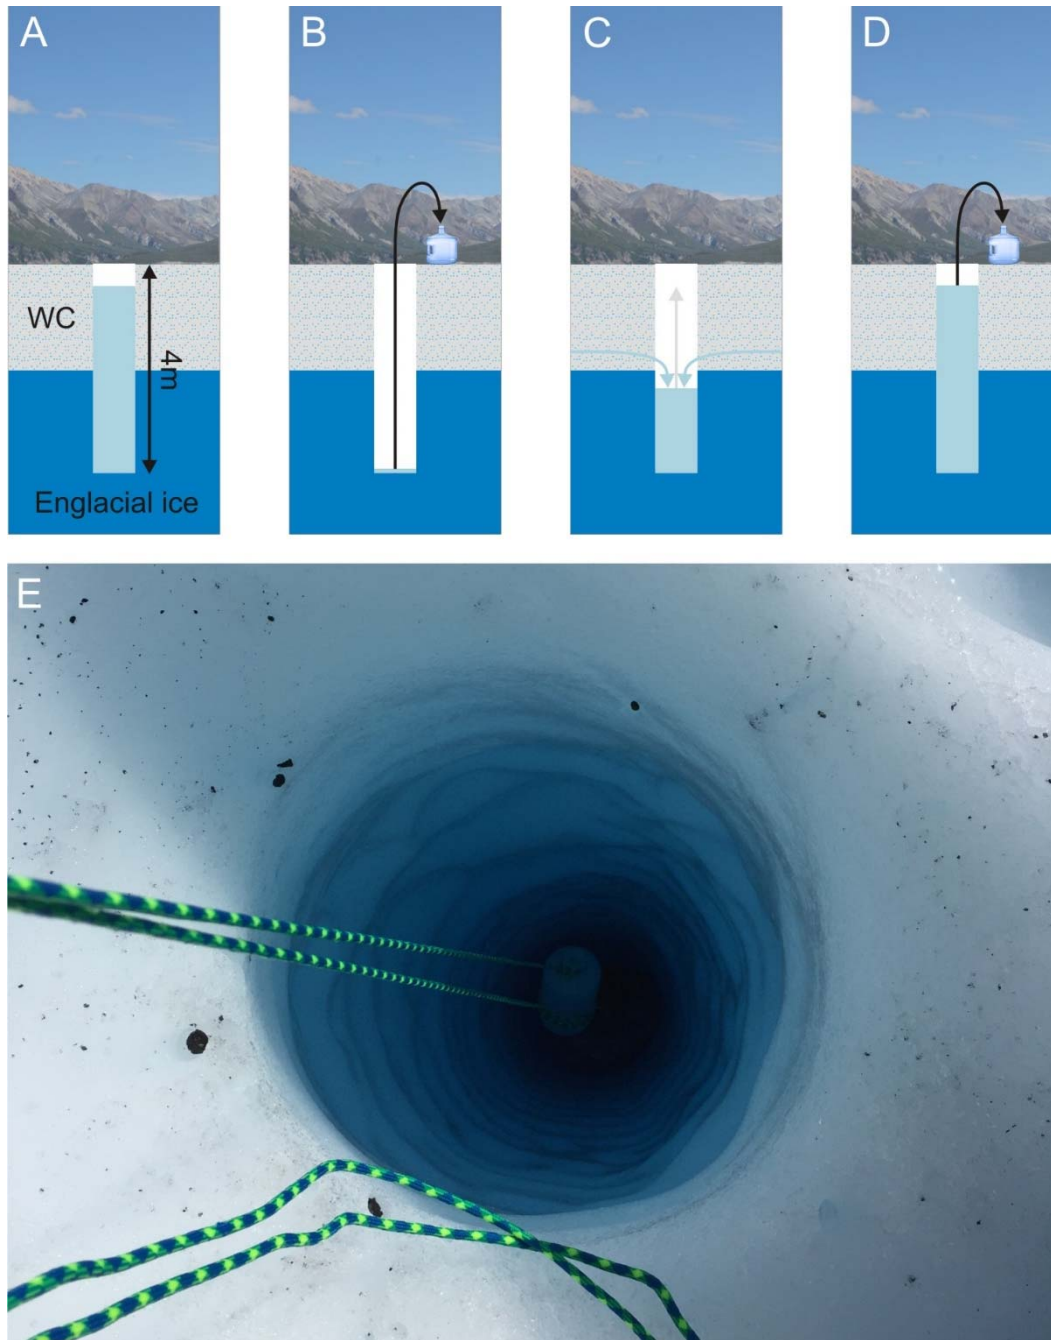

**Figure S1.** Sampling approach for collection of water samples from the WCA. After melting boreholes of ~4 m depth into the ice (A), the water generated was removed and sampled (B). Water that subsequently percolated laterally from the WCA collected in the boreholes (C) and was sampled at the surface with tubing and a peristaltic pump (D) or by lowering clean acid-washed HDPE bottles into the borehole (E). WC = weathering crust.

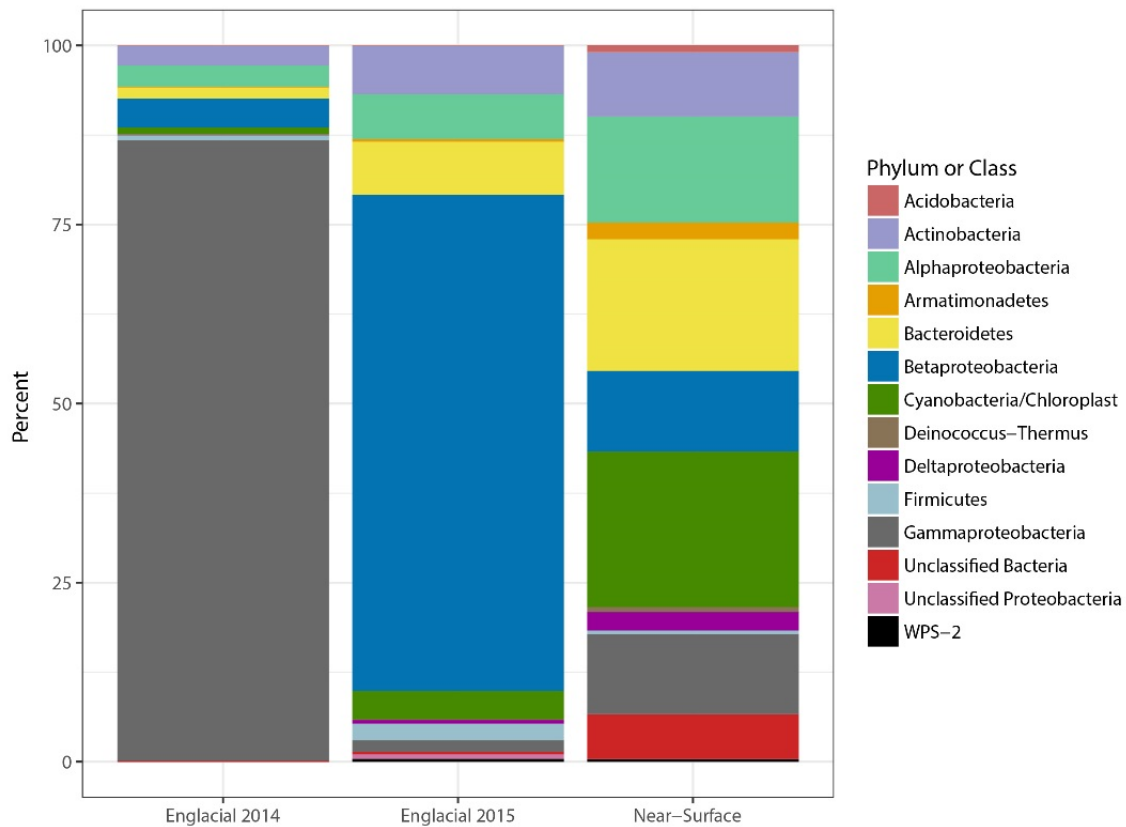

**Figure S2.** The relative abundance of bacterial phyla within samples obtained from the deepest boreholes ('Englacial 2014' and 'Englacial 2015') with those in near-surface ice and water. All sequences are classified at the phylum level with the exception of the Proteobacteria, which are designated by class.

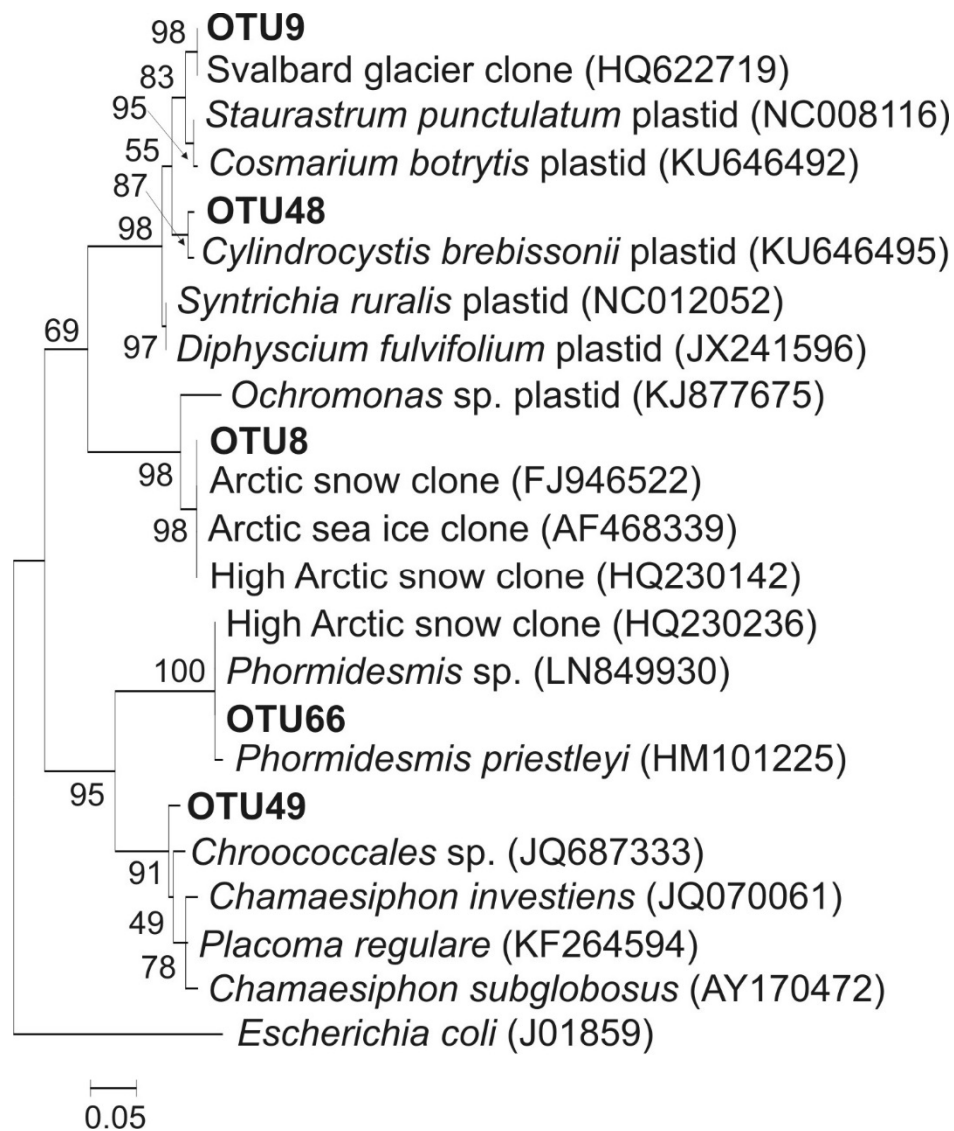

**Figure S3.** Phylogenetic analysis of 16S rRNA gene sequences (positions 533 to 786, *Escherichia coli* numbering) related to phototrophic cyanobacteria and algal plastids. Genbank accession numbers are listed in parentheses. The scale bar represents 0.05 substitutions per site and bootstrap values are shown as a percentage of 1000 replications.

**Table S1.** Year, volume, and borehole properties for the samples collected in this study.

| Sample <sup>†</sup> | Internal designation | Year of sampling | Sample volume (L) | Borehole | Diameter (cm) | Depth (m)   |
|---------------------|----------------------|------------------|-------------------|----------|---------------|-------------|
| BH1a (0.8µm)        | En1_8µm              | 2014             | 10                | 1        | 30            | 10          |
| BH1a (3µm)          | En1_3µm              | 2014             | 10                | 1        | 30            | 10          |
| BH1b                | En2                  | 2014             | 50                | 1        | 30            | 10          |
| BH1c (0.2µm)        | Mat-En-3 (0.2µm)     | 2014             | 404               | 1        | 30            | 10          |
| BH1c (0.8µm)        | Mat-En-3 (0.8µm)     | 2014             | 404               | 1        | 30            | 10          |
| BH1c (3µm)          | Mat-En-3 (3µm)       | 2014             | 404               | 1        | 30            | 10          |
| BH2a (0.2µm)        | Mat-En-6 (0.2µm)     | 2014             | 27                | 2        | 30            | 15          |
| BH2a (0.8µm)        | Mat-En-6 (0.8µm)     | 2014             | 27                | 2        | 30            | 15          |
| BH2a (3µm)          | Mat-En-6 (3µm)       | 2014             | 27                | 2        | 30            | 15          |
| BH2b                | Mat-En-11            | 2014             | 40                | 2        | 30            | 15          |
| BH2c                | Mat-En-12            | 2014             | 30                | 2        | 30            | 15          |
| BH2d (0.2µm)        | Mat-En-18 (0.2µm)    | 2014             | 176               | 2        | 30            | 30          |
| BH2d (0.8µm)        | Mat-En-18 (0.8µm)    | 2014             | 176               | 2        | 30            | 30          |
| BH2d (3µm)          | Mat-En-18 (3µm)      | 2014             | 176               | 2        | 30            | 30          |
| BH3                 | Mat-En-8             | 2014             | 40                | 3        | 30            | 4           |
| BH4a                | Mat-En-13            | 2014             | 28                | 4        | 10            | 4           |
| BH4b                | Mat-En-19            | 2014             | 20                | 4        | 10            | 4           |
| BH5                 | En15                 | 2014             | 50                | 5        | 30            | 7           |
| Supraglacial        | Sp2                  | 2014             | 61                | -        | -             | -           |
| BH6a                | Val 3 filter #3      | 2015             | 20                | Val2     | 30            | 4.4 - 5.2   |
| BH6b                | V3F6                 | 2015             | 29                | Val2     | 30            | 5.3 - 5.5   |
| BH6c                | Val4                 | 2015             | 20                | Val2     | 30            | 8.3 - 9.8   |
| BH7a                | Val 5 filter #3      | 2015             | 30                | Val3     | 30            | 1.4 - 4.4   |
| BH7b                | Val 5 filter #6      | 2015             | 30                | Val3     | 30            | 4.4 - 6.8   |
| BH7c                | Val 6 filter #3      | 2015             | 60                | Val3     | 30            | 11.1 - 15.4 |
| BH8                 | B2D                  | 2015             | 60                | 2        | 10            | 5           |
| BH9                 | B3_15                | 2015             | ND                | 3        | 10            | 4           |
| BH10a               | B4D                  | 2015             | 60                | 4        | 10            | 4           |
| BH10b               | B4R2                 | 2015             | 25                | 4        | 10            | 4           |
| BH10c               | B4R3                 | 2015             | 60                | 4        | 10            | 4           |
| BH10d               | B4R4                 | 2015             | 25                | 4        | 10            | 4           |

<sup>†</sup> Ten boreholes, designated BH1 to BH10, were sampled. Multiple samples obtained from the same borehole are indicated by letters (e.g., BH1a, BH1b, and BH1c). Names followed by parentheses (e.g., 0.2µm) specify filter pore sizes for samples that were size-fractionated.

ND = no data available

**Table S2.** Concentration of major ions and elements (ppb) in melt water from discrete ice depths (BH6 and BH7) and the WCA (sample BH10b). The limit of detection is listed parenthetically below each analyte.

| Depth (m)<br>or sample | Na <sup>+</sup><br>(0.40) | Mg <sup>2+</sup><br>(0.26) | Al <sup>3+</sup><br>(0.69) | K <sup>+</sup><br>(0.95) | Ca <sup>2+</sup><br>(0.31) | Cr <sup>3+</sup><br>(0.24) | Mn <sub>(aq)</sub><br>(0.21) | Fe <sub>(aq)</sub><br>(0.19) | Co <sup>2+</sup><br>(0.06) | Ni <sup>2+</sup><br>(0.37) | Zn <sup>2+</sup><br>(2.92) | Sr <sup>2+</sup><br>(0.25) | Ba <sup>2+</sup><br>(0.37) | Pb <sup>2+</sup><br>(0.33) | F <sup>-</sup><br>(112) | Cl <sup>-</sup><br>(90) | SO <sub>4</sub> <sup>2-</sup><br>(41) | Br <sup>-</sup><br>(520) | NO <sub>3</sub> <sup>-</sup><br>(53) | HCO <sub>3</sub> <sup>-</sup><br>† |
|------------------------|---------------------------|----------------------------|----------------------------|--------------------------|----------------------------|----------------------------|------------------------------|------------------------------|----------------------------|----------------------------|----------------------------|----------------------------|----------------------------|----------------------------|-------------------------|-------------------------|---------------------------------------|--------------------------|--------------------------------------|------------------------------------|
| 1.453                  | 25.91                     | 6.54                       | 3.56                       | 12.35                    | 62.49                      | BD                         | 0.47                         | 3.09                         | 0.79                       | 0.48                       | 8.90                       | 0.33                       | BD                         | 0.62                       | BD                      | BD                      | 152.4                                 | BD                       | BD                                   | 74.10                              |
| 1.537                  | 18.96                     | 5.08                       | 2.60                       | 8.87                     | 54.45                      | BD                         | 0.37                         | 1.86                         | 0.68                       | BD                         | 8.67                       | 0.29                       | BD                         | 0.47                       | BD                      | BD                      | 98.7                                  | BD                       | BD                                   | 192.68                             |
| 1.557                  | 22.94                     | 4.90                       | 2.87                       | 11.65                    | 57.10                      | 0.25                       | 0.41                         | 2.37                         | 0.67                       | 0.46                       | 9.45                       | 0.30                       | BD                         | 0.41                       | BD                      | BD                      | 120.0                                 | BD                       | BD                                   | 201.23                             |
| 1.569                  | 28.88                     | 6.05                       | 4.29                       | 16.25                    | 76.22                      | 0.27                       | 0.46                         | 1.83                         | 0.67                       | 0.63                       | 10.21                      | 0.35                       | BD                         | 0.58                       | BD                      | BD                      | 119.8                                 | BD                       | 90.6                                 | 199.09                             |
| 1.622                  | 25.32                     | 5.18                       | 4.64                       | 13.06                    | 96.49                      | 0.24                       | 0.44                         | 2.02                         | 0.63                       | 0.56                       | 10.05                      | 0.33                       | 0.42                       | 0.57                       | BD                      | BD                      | 133.8                                 | BD                       | 54.2                                 | 255.81                             |
| 2.499                  | 7.72                      | 1.59                       | 2.33                       | 3.54                     | 21.38                      | BD                         | BD                           | 0.82                         | 0.51                       | BD                         | BD                         | BD                         | BD                         | BD                         | BD                      | BD                      | 122.2                                 | BD                       | BD                                   | 0.00                               |
| 2.709                  | 9.13                      | 1.47                       | 2.61                       | 3.80                     | 19.79                      | BD                         | BD                           | 0.95                         | 0.44                       | BD                         | BD                         | BD                         | BD                         | BD                         | BD                      | BD                      | 132.7                                 | BD                       | BD                                   | 0.00                               |
| 3.312                  | 20.28                     | 6.06                       | 4.81                       | 6.12                     | 110.61                     | BD                         | 0.38                         | 4.99                         | 0.34                       | BD                         | BD                         | BD                         | 0.72                       | BD                         | BD                      | BD                      | 157.2                                 | BD                       | 101.2                                | 188.99                             |
| 4.042                  | 15.88                     | 6.08                       | 2.14                       | 3.64                     | 71.35                      | BD                         | 0.26                         | 0.87                         | 0.36                       | BD                         | BD                         | BD                         | 0.49                       | BD                         | BD                      | BD                      | 127.8                                 | BD                       | BD                                   | 165.60                             |
| 4.066                  | 11.30                     | 6.79                       | 1.46                       | 4.23                     | 60.57                      | BD                         | 0.31                         | 1.41                         | 0.38                       | BD                         | 6.90                       | BD                         | 0.40                       | BD                         | BD                      | BD                      | 179.1                                 | BD                       | BD                                   | 27.83                              |
| 4.357                  | 19.36                     | 2.65                       | 1.32                       | 2.89                     | 28.82                      | BD                         | BD                           | 0.82                         | 0.31                       | BD                         | BD                         | BD                         | BD                         | BD                         | BD                      | BD                      | 131.3                                 | BD                       | BD                                   | 65.13                              |
| 5.274                  | 10.89                     | 1.66                       | 1.50                       | 4.35                     | 47.49                      | BD                         | BD                           | 1.15                         | 0.34                       | BD                         | BD                         | BD                         | BD                         | BD                         | BD                      | BD                      | 96.3                                  | BD                       | 68.4                                 | 60.08                              |
| 5.501                  | 12.31                     | 2.03                       | 1.52                       | 2.79                     | 33.09                      | BD                         | BD                           | 0.62                         | 0.35                       | BD                         | BD                         | BD                         | BD                         | BD                         | BD                      | BD                      | 130.8                                 | BD                       | BD                                   | 64.89                              |
| 5.538                  | 10.46                     | 1.73                       | 1.53                       | 2.46                     | 40.11                      | BD                         | BD                           | 0.45                         | 0.39                       | BD                         | BD                         | BD                         | BD                         | BD                         | BD                      | BD                      | 114.9                                 | BD                       | BD                                   | 89.43                              |
| 5.732                  | 10.98                     | 2.10                       | 2.01                       | 2.52                     | 41.09                      | BD                         | BD                           | 0.75                         | 0.33                       | BD                         | BD                         | BD                         | BD                         | BD                         | BD                      | BD                      | 115.2                                 | BD                       | BD                                   | 81.26                              |
| 5.966                  | 14.35                     | 2.54                       | 0.99                       | 2.18                     | 30.25                      | BD                         | BD                           | 1.25                         | 0.66                       | BD                         | BD                         | BD                         | BD                         | BD                         | BD                      | BD                      | 112.7                                 | BD                       | BD                                   | 74.68                              |
| 6.332                  | 10.36                     | 1.76                       | 1.19                       | 2.00                     | 27.71                      | BD                         | BD                           | 1.34                         | 0.33                       | BD                         | BD                         | BD                         | BD                         | BD                         | BD                      | 132.23                  | 124.1                                 | BD                       | BD                                   | 0.00                               |
| 6.354                  | 9.13                      | 1.66                       | 1.14                       | 2.27                     | 33.64                      | BD                         | BD                           | 1.45                         | 0.30                       | BD                         | BD                         | BD                         | BD                         | BD                         | BD                      | 220.24                  | 126.0                                 | BD                       | BD                                   | 0.00                               |
| 6.428                  | 11.21                     | 1.45                       | 1.28                       | 1.35                     | 44.34                      | BD                         | BD                           | 2.13                         | 0.26                       | BD                         | BD                         | BD                         | 0.39                       | BD                         | BD                      | BD                      | 121.9                                 | BD                       | BD                                   | 0.00                               |
| 6.592                  | 7.79                      | 2.58                       | 1.73                       | 1.45                     | 31.99                      | BD                         | BD                           | 1.28                         | 0.28                       | BD                         | 3.47                       | BD                         | 0.39                       | BD                         | BD                      | BD                      | 115.7                                 | BD                       | BD                                   | 0.00                               |
| 7.499                  | 32.92                     | 7.80                       | 1.80                       | 5.25                     | 102.92                     | BD                         | 0.53                         | 2.08                         | 0.31                       | BD                         | BD                         | 0.44                       | BD                         | BD                         | BD                      | 197.00                  | 205.5                                 | BD                       | 59.8                                 | 0.00                               |
| 8.052                  | 22.68                     | 10.76                      | 8.71                       | 7.31                     | 87.03                      | BD                         | 0.70                         | 9.38                         | 0.33                       | BD                         | BD                         | 0.41                       | BD                         | BD                         | BD                      | 124.06                  | 176.6                                 | BD                       | 110.2                                | 0.00                               |
| 8.134                  | 12.77                     | 10.73                      | 10.12                      | 7.35                     | 64.89                      | 0.25                       | 0.86                         | 13.74                        | 0.34                       | BD                         | 2.93                       | 0.39                       | BD                         | BD                         | BD                      | 191.19                  | 181.5                                 | BD                       | 85.3                                 | 0.00                               |
| 8.256                  | 36.50                     | 12.32                      | 3.80                       | 6.21                     | 94.45                      | BD                         | 0.93                         | 4.79                         | 0.34                       | BD                         | BD                         | 0.49                       | BD                         | BD                         | BD                      | 168.60                  | 159.9                                 | BD                       | BD                                   | 64.17                              |
| WCA*                   | 91.14                     | 5.32                       | 11.11                      | 54.55                    | 31.81                      | 0.05                       | 0.64                         | 10.51                        | 0.03                       | 0.20                       | 6.08                       | NA                         | 0.16                       | 0.03                       | 18.80                   | 62.04                   | 44.6                                  | 5.00                     | 10.40                                | 253.90                             |

BD = below the analytical limit of detection; NA = not analyzed

† HCO<sub>3</sub><sup>-</sup> was not analytically determined and the concentration was estimated based on charge balance.

\*The WCA sample (BH10b) was pre-concentrated by a factor of 100 before analysis. The limit of detection for Na<sup>+</sup> (1.0), Mg<sup>2+</sup> (1.0), Al<sup>3+</sup> (0.017), K<sup>+</sup> (0.2), Ca<sup>2+</sup> (0.7), Cr<sup>+3</sup> (0.009), Mn<sub>(aq)</sub> (0.007), Fe<sub>(aq)</sub> (1.3), Co<sup>+2</sup> (0.007), Ni<sup>+2</sup> (0.004), Zn<sup>+2</sup> (0.006), Ba<sup>+2</sup> (0.002), Pb<sup>+2</sup> (0.001), F<sup>-</sup> (0.11), Cl<sup>-</sup> (0.09), SO<sub>4</sub><sup>2-</sup> (0.04), Br<sup>-</sup> (0.5), and NO<sub>3</sub><sup>-</sup> (0.05) in the WCA sample corrects for the pre-concentration factor.

**Table S3.** Number of sequences, coverage, and alpha diversity in the samples.

| <b>Sample</b> | <b>Number of sequences</b> | <b>Total OTUs†</b> | <b>Good's coverage estimator</b> | <b>Inverse Simpson index</b> |
|---------------|----------------------------|--------------------|----------------------------------|------------------------------|
| BH1a (0.8µm)  | 222906                     | 313                | 0.998                            | 22.7                         |
| BH1a (0.3µm)  | 126933                     | 231                | 0.998                            | 23.3                         |
| BH1b          | 106903                     | 235                | 0.998                            | 22.5                         |
| BH1c (0.2µm)  | 240477                     | 1574               | 0.981                            | 4.34                         |
| BH1c (0.8µm)  | 183232                     | 1127               | 0.985                            | 12.5                         |
| BH1c (3µm)    | 312584                     | 1226               | 0.985                            | 2.83                         |
| BH2a (0.2µm)  | 198979                     | 825                | 0.991                            | 3.47                         |
| BH2a (0.8µm)  | 242377                     | 647                | 0.994                            | 2.58                         |
| BH2a (3µm)    | 178910                     | 864                | 0.989                            | 3.32                         |
| BH2b          | 270665                     | 1303               | 0.988                            | 3.29                         |
| BH2c          | 277139                     | 1151               | 0.989                            | 3.68                         |
| BH2d (0.2µm)  | 214399                     | 767                | 0.992                            | 3.64                         |
| BH2d (0.8µm)  | 174365                     | 680                | 0.992                            | 3.72                         |
| BH2d (3µm)    | 219582                     | 1192               | 0.982                            | 7.59                         |
| BH3           | 108663                     | 936                | 0.989                            | 29.0                         |
| BH4a          | 27992                      | 458                | 0.995                            | 27.6                         |
| BH4b          | 98201                      | 860                | 0.990                            | 10.4                         |
| BH5           | 180836                     | 1331               | 0.980                            | 9.95                         |
| Supraglacial  | 214369                     | 1623               | 0.978                            | 20.0                         |
| BH6a          | 144092                     | 3429               | 0.961                            | 18.7                         |
| BH6b          | 33811                      | 870                | 0.981                            | 11.8                         |
| BH6c          | 340637                     | 4651               | 0.983                            | 4.60                         |
| BH7a          | 9151                       | 202                | 0.996                            | 4.06                         |
| BH7b          | 37750                      | 518                | 0.990                            | 5.64                         |
| BH7c          | 48403                      | 648                | 0.987                            | 7.09                         |
| BH8           | 725033                     | 8815               | 0.983                            | 3.30                         |
| BH9           | 285306                     | 1444               | 0.982                            | 20.0                         |
| BH10a         | 276258                     | 5274               | 0.974                            | 49.6                         |
| BH10b         | 650442                     | 9433               | 0.978                            | 4.08                         |
| BH10c         | 659868                     | 10587              | 0.977                            | 27.1                         |
| BH10d         | 465699                     | 8991               | 0.974                            | 16.4                         |

† Excluding singletons and OTUs identified as potential contaminants.

**Table S4.** Information on the amplified 18S rRNA gene sequences from sample BH10d.

| <b>Clone/OTU designation</b> | <b>Clones per OTU</b> | <b>Genbank accession no.</b> | <b>Nearest phylogenetic neighbor (Genbank accession no.)</b>           | <b>% identity to the nearest neighbor</b> |
|------------------------------|-----------------------|------------------------------|------------------------------------------------------------------------|-------------------------------------------|
| BH10d-clone34                | 4                     | MH037315                     | <i>Ancydonema nordenskioldii</i> strain CCCryo BS_0001-2000 (AF514397) | 99%                                       |
| BH10d-clone35                | 1                     | MH037316                     | Uncultured Scuticociliatia clone PR3_4E_59 (GU479975)                  | 97%                                       |
| BH10d-clone39                | 1                     | MH037317                     | <i>Oberwinklerozyma silvestris</i> strain CBS 11420 (KJ708366)         | 98%                                       |
| BH10d-clone40                | 1                     | MH037318                     | <i>Ancydonema nordenskioldii</i> strain CCCryo BS_0001-2000 (AF514397) | 91%                                       |
| BH10d-clone44                | 7                     | MH037319                     | <i>Rotaria rotatoria</i> (DQ089736)                                    | 99%                                       |
| BH10d-clone46                | 1                     | MH037320                     | <i>Pseudophacidium ledi</i> (AF315623)                                 | 99%                                       |
| BH10d-clone55                | 10                    | MH037321                     | <i>Ochromonas</i> sp. CCMP1899 (EF165133)                              | 99%                                       |
